# Supplementary material for: Revealing the Increased Stress Response Behavior through Transcriptomic Analysis of Adult Zebrafish Brain after Chronic Low to Moderate Dose Rates of Ionizing Radiation
Source: MDPI journal article supplement (doi:10.3390/cancers14153793), 2022-08-04
Supplement: s1 [file s1]

**Table S2. Go terms associated to neurohormones or neurotransmitters for the volcano-plot of differentially expressed genes (DEG).**

| Neurohormones/<br>neurotransmitters | Go terms                                                                                                                                                                                                                                                                           |
|-------------------------------------|------------------------------------------------------------------------------------------------------------------------------------------------------------------------------------------------------------------------------------------------------------------------------------|
| Acetylcholine                       | GO:0008292, GO:0022848, GO:0015464, GO:0042166, GO:0005892, GO:0071340, GO:0016907, GO:0007197, GO:0005277, GO:0007213, GO:0033130, GO:1904395, GO:0003990, GO:0006581, GO:0030548, GO:0030550                                                                                     |
| Angiotensin                         | GO:0031701, GO:0038166, GO:0003081, GO:0002003, GO:0004945, GO:0001596, GO:0086097                                                                                                                                                                                                 |
| Arginin-<br>vasopressin             | GO:0005000, GO:0001992                                                                                                                                                                                                                                                             |
| Corticotropin                       | GO:0004978, GO:0071376, GO:0043404, GO:0051424, GO:0051460, GO:1900011, GO:0051431, GO:0051429                                                                                                                                                                                     |
| Cortisol                            | GO:0051414, GO:0034650, GO:0034651                                                                                                                                                                                                                                                 |
| Dopamine                            | GO:0004968, GO:0097211, GO:0005183, GO:0031530                                                                                                                                                                                                                                     |
| Epinephrin                          | GO:0001994, GO:0042421, GO:0032812, GO:0048242, GO:0071871, GO:0042415, GO:0005334, GO:0015874, GO:0051620                                                                                                                                                                         |
| GABA                                | GO:0097154, GO:0004890, GO:0022851, GO:0051932, GO:1902711, GO:0032228, GO:0004965, GO:0050811                                                                                                                                                                                     |
| Glucocorticoid                      | GO:0051384, GO:0004883, GO:0042921, GO:0043402, GO:0006704, GO:0035259, GO:0031943, GO:0071385                                                                                                                                                                                     |
| Glutamate                           | GO:0004970, GO:0008066, GO:0035235, GO:0035249, GO:0004971, GO:0032281, GO:0098978, GO:0004972, GO:0017146, GO:0008328, GO:0015277, GO:0032983, GO:0007216, GO:0051966, GO:0035256, GO:0001641, GO:0007196, GO:0051967, GO:2000312, GO:0035255, GO:0051968, GO:0098990, GO:1905962 |
| Gonadotropin                        | GO:0004968, GO:0097211, GO:0005183, GO:0031530                                                                                                                                                                                                                                     |
| Hypocretin                          | GO:0031771, GO:0031772, GO:0042324                                                                                                                                                                                                                                                 |
| Melatonin                           | GO:0008502, GO:0030186, GO:0030187                                                                                                                                                                                                                                                 |
| Norepinephrine                      | GO:0001994, GO:0042421, GO:0042415, GO:0005334, GO:0015874, GO:0051620                                                                                                                                                                                                             |
| Oxytocin                            | GO:0004990                                                                                                                                                                                                                                                                         |
| Serotonin                           | GO:0004993, GO:0051378, GO:0007198, GO:0098664, GO:0005335, GO:0051610, GO:0006837, GO:0031821, GO:0042427, GO:0042428, GO:0007210                                                                                                                                                 |
| Thyrotropin                         | GO:0031531, GO:0004997, GO:0008437                                                                                                                                                                                                                                                 |
